# Supplementary material for: Targeted A-to-G base editing of chloroplast DNA in plants
Source: PubMed Central journal article supplement (PMC9788985; doi:10.1038/s41477-022-01279-8), 2022-12-01
Supplement: 41477_2022_1279_MOESM1_ESM.pdf [file 41477_2022_1279_MOESM1_ESM.pdf]

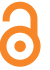

---

# Targeted A-to-G base editing of chloroplast DNA in plants

---

In the format provided by the authors and unedited

---

## Supplementary Information

### Targeted A-to-G base editing of chloroplast DNA in plants

Young Geun Mok<sup>1,3,4</sup>, Sunghyun Hong<sup>1,3,4</sup>, Su-Ji Bae<sup>1</sup>, Sung-Ik Cho<sup>1,2</sup>, and Jin-Soo Kim<sup>1,3</sup>

<sup>1</sup> Center for Genome Engineering, Institute for Basic Science, Daejeon, Republic of Korea.

<sup>2</sup> Department of Chemistry, Seoul National University, Seoul, Republic of Korea.

<sup>3</sup> Present address: GreenGene Inc. Seoul, Republic of Korea.

<sup>4</sup> These authors contributed equally to this work.

Correspondence should be addressed to J.-S.K. ([jskim01@snu.ac.kr](mailto:jskim01@snu.ac.kr)).

**Supplementary Table 1. TALE binding sequences**

**Supplementary Table 2. PCR primer sequences for cloning, genotype and in vitro transcription templates.**

**Supplementary Table 3. 1<sup>st</sup> PCR primer sequences for targeted deep sequencing.**

**Supplementary Table 4. Genotyping and 2<sup>nd</sup> PCR primer sequences for targeted deep sequencing.**

**Supplementary Sequence 1. Amino acid sequences of TALE components.**

**Supplementary Sequence 2. DNA sequences of RPS5A promoter and 35S terminator.**

**Supplementary Table 1. TALE binding sequences.**

| Species                            | Gene               | position      | sequence (5' to 3')                          |
|------------------------------------|--------------------|---------------|----------------------------------------------|
| Arabidopsis<br>&<br>Lettuce Sativa | rm16S<br>&<br>rm16 | Left<br>Right | taaggggcatgatgacttga<br>tgccggtgataagccggagg |
| Arabidopsis<br>&<br>Lettuce Sativa | psaA               | Left<br>Right | tctgggtccggcgaacgaat<br>tgtgttggtccggaagagga |
| Arabidopsis                        | rbcL H294          | Left<br>Right | tgccgagataatggcctact<br>tatcaataacagcgtgcatt |
| Lettuce Sativa                     | psbA               | Left<br>Right | tggttgaaattgaaaccatt<br>tgctttaggtatcagcact  |

**Supplementary Table 2. PCR primer sequences for cloning, genotype and in vitro transcription templates.**

| Name          | Sequence (5` to 3`)                                                     |
|---------------|-------------------------------------------------------------------------|
| TALE F        | caaggatgacgatgacaagccccgggatctacgcacgctcggctacagccagcag                 |
| TALE 1397 N R | gtagctacctgatccggatcccccaaccctttttcacagcatcc                            |
| TALE 1397 C R | gtatggcactgccggatcccccaaccctttttcacagcatcc                              |
| G1397N F      | gggggtgggggatccggatcaggtagctacgcacttgggtcc                              |
| G1397N R      | ccgcgggatatcgattatcaggtagccttcagggtgggacgacagtc                         |
| 1397C F       | tgaaaaggggtgggggatccggcagtgccatacctgtgaag                               |
| 1397C ABE R   | catggccggggatatcgattatcaggtagccttagttgatggagctctgggccttc                |
| Basta F       | tcagatttcggtgacgggca                                                    |
| Basta R       | atgagcccagaacgacgc                                                      |
| RPS5A mRNA F  | taatacgactcactatagggagagctctgtttctctcaccacagccatggattcacagctagtcttgtctc |
| RPS5A mRNA R  | cggacgtcgcatgcctgcaggctcactggattttgg                                    |

**Supplementary Table 3. 1<sup>st</sup> PCR primer sequences for targeted deep sequencing.**

| Name             | Forward sequence (5' to 3')     | Reverse sequence (5' to 3')           |
|------------------|---------------------------------|---------------------------------------|
| At & Ls 16S rRNA | aacgaattcaccgccgtatg            | gctcgcgtctgattagctag                  |
| AtpsaA           | ccaagtggtagtatcaggtcccttagc     | cccagatcgacttccagatcataattgc          |
| AtrbcL           | gccagagaattgggagttcctatcgtaatgc | ccttcaagtttacctactactgtaccgcgctg      |
| LspsbA           | gcataacttccataccaaggttagcacgg   | catggttatTTTggccgattgatcttcc          |
| LpsaA            | cccggtctagcccattcctcgaatgaag    | ctctagtgaataactaaagaaaatagatagatgggag |

**Supplementary Table 4. Genotyping and 2<sup>nd</sup> PCR primer sequences for targeted deep sequencing.**

| Name               | Sequence (5' to 3')                                                     |
|--------------------|-------------------------------------------------------------------------|
| At & Ls 16S rRNA F | acactctttccctacacgacgctcttccgatctgttgacagcctgcaatccgaactgaggac          |
| At & Ls 16S rRNA R | gtgactggagttcagacgtgtgctcttccgatctgtaagggttgggtaagtcccgcaacg            |
| AtpsaA F           | acactctttccctacacgacgctcttccgatctccaagtggtagtatcaggctcccttagc           |
| AtpsaA R           | gtgactggagttcagacgtgtgctcttccgatctaaaattctaagtatctatcatcggttcac         |
| AtrbcL F           | acactctttccctacacgacgctcttccgatctgccagagaattgggagttcctatcgtaatgc        |
| AtrbcL R           | gtgactggagttcagacgtgtgctcttccgatctccttcaagtttacctactactgtaccgcgtg       |
| LspsbA F           | acactctttccctacacgacgctcttccgatctgcataactccataccaaggtttagcacgg          |
| LspsbA R           | gtgactggagttcagacgtgtgctcttccgatctcatggttatgttggccgattgatcttcc          |
| LpsaA F            | acactctttccctacacgacgctcttccgatctcccggctagcccattcctcgaatgaag            |
| LpsaA R            | gtgactggagttcagacgtgtgctcttccgatctctctagtgaataactaaagaaaatagatagatgggag |

**Supplementary Sequence 1. Amino acid sequences of TALED components.**

**CTS**

**MDSQLVLSLKLNPSFTPLSPLFPFTPCSSSFPSLRFSSCYSRRLYSPVTVYAAK**

**3xflag**

**DYKDHDGDYKDHDIDYKDDDDK**

**N terminal domain of TALE array**

**DLRTLGYSSQQQEKIKPKVRSTVAQHHEALVGHGFTHAHIVALSQHPAALGTVAVKYQDMIAALPEATHE  
AIVGVGKQWSGARALEALLTVAGELRGPPLQLDTGQLLKIAKRGGVTAVEAVHAWRNALTGAPLN**

**C terminal domain of TALE array**

**LTPEQVVAIASNNGGKQALESIVAQLSRPDPALAALTNDHLVALACLGGRPALDAVKKGLG**

**Linker 1 (TALE array – Linker 1-DddA<sub>tox</sub>)**

**GS**

**Linker 2 (DddA<sub>tox</sub>-Linker 2 -ABE8.0)**

**SGSETPGTSESATPES**

**DddA<sub>tox</sub> 1397N**

**GSGSYALGPYQISAPQLPAYNGQTVGTFYYVNDAGGLESKVFSGGPTYPNYANAGHVEGQSALFMRD  
NGISEGLVFHNNPEGTCGFCVNMETLLPENAKMTVVPPEG**

**DddA<sub>tox</sub> 1397C**

**GSAIPVKRGATGETKVFTGNSNSPKSPTKGGC**

**ABE 8.0**

**SEVEFSHEYWMRHALTLAKRARDEREVPVGAVLVLNRRVIGEGWNRAIGLHDPTAHAEIMALRQGGLV  
MQNYRLIDATLYVTFEPCVMCAGAMIHSRIGRVVFGVRNSKRGAAAGSLMNVLNYPGMNHRVEITEGILA  
DECAALLCDFYRMQRQVFNAQKKAQSSIN**

**psbA Left TALE repeat**

**LTPAQVVAIASNNGGKQALETVQRLLPVLCQAHGLTPAQVVAIASNNGGKQALETVQRLLPVLCQDHGLT  
PAQVVAIASNIGGKQALETVQRLLPVLCQDHGLTPDQVVAIASNIGGKQALETVQRLLPVLCQAHGLTPDQ  
VVAIASNIGGKQALETVQRLLPVLCQDHGLTPDQVVAIASNNGGKQALETVQRLLPVLCQAHGLTPAQVV  
AIASNNGGKQALETVQRLLPVLCQAHGLTPAQVVAIASNNGGKQALETVQRLLPVLCQDHGLTPAQVVAI  
ASNIGGKQALETVQRLLPVLCQAHGLTPDQVVAIASNIGGKQALETVQRLLPVLCQAHGLTPDQVVAIASN  
IGGKQALETVQRLLPVLCQAHGLTPAQVVAIASHDGGKQALETVQRLLPVLCQAHGLTPAQVVAIASHDG**

GKQALETVQRLLPVLCQDHGLTPDQVVAIASNIGGKQALETVQRLLPVLCQDHGLTPAQVVAIASNNGGK  
QALETVQRLLPVLCQAHGLTPEQVVAIASNNGGKQALETVQRLLPVLCQAHGLTPDQVVAIASNNGGKQA  
LETVQRLLPVLCQAHG

psbA Right TALE repeat

LTPDQVVAIASNNGGKQALETVQRLLPVLCQAHGLTPAQVVAIASHDGGKQALETVQRLLPVLCQDHGLT  
PDQVVAIASNNGGKQALETVQRLLPVLCQAHGLTPEQVVAIASNNGGKQALETVQRLLPVLCQAHGLTPD  
QVVAIASNNGGKQALETVQRLLPVLCQDHGLTPDQVVAIASNIGGKQALETVQRLLPVLCQDHGLTPAQV  
VAIASNNGGKQALETVQRLLPVLCQDHGLTPAQVVAIASNNGGKQALETVQRLLPVLCQDHGLTPDQV  
AIASNNGGKQALETVQRLLPVLCQAHGLTPDQVVAIASNIGGKQALETVQRLLPVLCQDHGLTPAQVVAIA  
SNGGKQALETVQRLLPVLCQAHGLTPAQVVAIASHDGGKQALETVQRLLPVLCQDHGLTPAQVVAIASN  
IGGKQALETVQRLLPVLCQDHGLTPDQVVAIASNNGGKQALETVQRLLPVLCQDHGLTPEQVVAIASHDG  
GKQALETVQRLLPVLCQAHGLTPEQVVAIASNIGGKQALETVQRLLPVLCQAHGLTPAQVVAIASHDGGK  
QALETVQRLLPVLCQDHG

rrn16S Left TALE repeat

LTPAQVVAIASNIGGKQALETVQRLLPVLCQDHGLTPDQVVAIASNIGGKQALETVQRLLPVLCQDHGLTP  
DQVVAIASNNGGKQALETVQRLLPVLCQAHGLTPAQVVAIASNNGGKQALETVQRLLPVLCQAHGLTPD  
QVVAIASNNGGKQALETVQRLLPVLCQDHGLTPEQVVAIASNNGGKQALETVQRLLPVLCQAHGLTPAQ  
VVAIASHDGGKQALETVQRLLPVLCQDHGLTPDQVVAIASNIGGKQALETVQRLLPVLCQDHGLTPAQV  
AIASNNGGKQALETVQRLLPVLCQAHGLTPAQVVAIASNNGGKQALETVQRLLPVLCQDHGLTPAQVVAI  
ASNIGGKQALETVQRLLPVLCQAHGLTPEQVVAIASNNGGKQALETVQRLLPVLCQAHGLTPAQVVAIAS  
NNGGKQALETVQRLLPVLCQDHGLTPAQVVAIASNIGGKQALETVQRLLPVLCQAHGLTPDQVVAIASHD  
GGKQALETVQRLLPVLCQAHGLTPEQVVAIASNNGGKQALETVQRLLPVLCQAHGLTPAQVVAIASNNGG  
KQALETVQRLLPVLCQAHGLTPDQVVAIASNNGGKQALETVQRLLPVLCQDHG

rrn16S Right TALE repeat

LTPDQVVAIASNNGGKQALETVQRLLPVLCQAHGLTPDQVVAIASHDGGKQALETVQRLLPVLCQDHGLT  
PDQVVAIASHDGGKQALETVQRLLPVLCQAHGLTPAQVVAIASNNGGKQALETVQRLLPVLCQDHGLTPA  
QVVAIASNNGGKQALETVQRLLPVLCQDHGLTPDQVVAIASNNGGKQALETVQRLLPVLCQAHGLTPAQ  
VVAIASNNGGKQALETVQRLLPVLCQDHGLTPAQVVAIASNIGGKQALETVQRLLPVLCQAHGLTPEQV  
AIASNNGGKQALETVQRLLPVLCQAHGLTPAQVVAIASNIGGKQALETVQRLLPVLCQDHGLTPDQVVAIA  
SNIGGKQALETVQRLLPVLCQDHGLTPDQVVAIASNNGGKQALETVQRLLPVLCQAHGLTPAQVVAIASH  
DGGKQALETVQRLLPVLCQDHGLTPDQVVAIASHDGGKQALETVQRLLPVLCQAHGLTPEQVVAIASN  
GGKQALETVQRLLPVLCQAHGLTPDQVVAIASNNGGKQALETVQRLLPVLCQDHGLTPAQVVAIASNIGG  
KQALETVQRLLPVLCQAHGLTPEQVVAIASNNGGKQALETVQRLLPVLCQAHG

psaA Left TALE repeat



LTPAQVVAIASHDGGKQALETVQRLPVLCQAHGLTPAQVVAIASNNGGKQALETVQRLPVLCQDHGLT  
PDQVVAIASNNGGKQALETVQRLPVLCQDHGLTPAQVVAIASNNGGKQALETVQRLPVLCQDHGLTPE  
QVVAIASNNGGKQALETVQRLPVLCQAHGLTPAQVVAIASNNGGKQALETVQRLPVLCQDHGLTPAQ  
VAIASHDGGKQALETVQRLPVLCQDHGLTPDQVVAIASHDGGKQALETVQRLPVLCQAHGLTPEQVVA  
IASNNGGKQALETVQRLPVLCQAHGLTPAQVVAIASNNGGKQALETVQRLPVLCQAHGLTPDQVVAIA  
SHDGGKQALETVQRLPVLCQDHGLTPAQVVAIASNNGGKQALETVQRLPVLCQAHGLTPDQVVAIAS  
NIGGKQALETVQRLPVLCQAHGLTPDQVVAIASNIGGKQALETVQRLPVLCQAHGLTPAQVVAIASHDG  
GKQALETVQRLPVLCQAHGLTPEQVVAIASNNGGKQALETVQRLPVLCQAHGLTPDQVVAIASNIGGK  
QALETVQRLPVLCQDHGLTPDQVVAIASNIGGKQALETVQRLPVLCQAHG

psaA Right TALE repeat

LTPEQVVAIASNNGGKQALETVQRLPVLCQAHGLTPDQVVAIASNNGGKQALETVQRLPVLCQDHGLT  
PAQVVAIASNNGGKQALETVQRLPVLCQAHGLTPEQVVAIASNNGGKQALETVQRLPVLCQAHGLTPA  
QVVAIASNNGGKQALETVQRLPVLCQAHGLTPDQVVAIASNNGGKQALETVQRLPVLCQDHGLTPAQ  
VVAIASNNGGKQALETVQRLPVLCQDHGLTPAQVVAIASHDGGKQALETVQRLPVLCQAHGLTPEQVV  
AIASHDGGKQALETVQRLPVLCQAHGLTPAQVVAIASNNGGKQALETVQRLPVLCQAHGLTPDQVVAI  
ASNNGGKQALETVQRLPVLCQDHGLTPAQVVAIASNIGGKQALETVQRLPVLCQAHGLTPAQVVAIAS  
NIGGKQALETVQRLPVLCQDHGLTPDQVVAIASNIGGKQALETVQRLPVLCQDHGLTPDQVVAIASNN  
GGKQALETVQRLPVLCQAHGLTPAQVVAIASNIGGKQALETVQRLPVLCQAHGLTPAQVVAIASNNGG  
KQALETVQRLPVLCQDHGLTPAQVVAIASNNGGKQALETVQRLPVLCQAHG

rbc L Left TALE repeat

LTPDQVVAIASNNGGKQALETVQRLPVLCQAHGLTPDQVVAIASHDGGKQALETVQRLPVLCQDHGLT  
PDQVVAIASHDGGKQALETVQRLPVLCQAHGLTPDQVVAIASNNGGKQALETVQRLPVLCQDHGLTP  
AQVVAIASNIGGKQALETVQRLPVLCQAHGLTPEQVVAIASNNGGKQALETVQRLPVLCQAHGLTPAQ  
VVAIASNIGGKQALETVQRLPVLCQDHGLTPAQVVAIASNNGGKQALETVQRLPVLCQDHGLTPDQVV  
AIASNIGGKQALETVQRLPVLCQAHGLTPEQVVAIASNIGGKQALETVQRLPVLCQAHGLTPAQVVAIAS  
NNGGKQALETVQRLPVLCQAHGLTPAQVVAIASNNGGKQALETVQRLPVLCQDHGLTPDQVVAIASN  
NNGKQALETVQRLPVLCQAHGLTPDQVVAIASHDGGKQALETVQRLPVLCQDHGLTPDQVVAIASHD  
GGKQALETVQRLPVLCQAHGLTPEQVVAIASNNGGKQALETVQRLPVLCQAHGLTPDQVVAIASNIGG  
KQALETVQRLPVLCQAHGLTPAQVVAIASHDGGKQALETVQRLPVLCQDHG

rbc L Right TALE repeat

LTPDQVVAIASNIGGKQALETVQRLPVLCQDHGLTPAQVVAIASNNGGKQALETVQRLPVLCQAHGLTP  
AQVVAIASHDGGKQALETVQRLPVLCQDHGLTPDQVVAIASNIGGKQALETVQRLPVLCQAHGLTPDQ  
VVAIASNIGGKQALETVQRLPVLCQDHGLTPDQVVAIASNNGGKQALETVQRLPVLCQAHGLTPDQVV  
AIASNIGGKQALETVQRLPVLCQAHGLTPDQVVAIASNIGGKQALETVQRLPVLCQAHGLTPAQVVAIA  
SHDGGKQALETVQRLPVLCQAHGLTPAQVVAIASNIGGKQALETVQRLPVLCQDHGLTPDQVVAIASN  
NNGKQALETVQRLPVLCQDHGLTPEQVVAIASHDGGKQALETVQRLPVLCQAHGLTPEQVVAIASNNG

GKQALETVQRLLPVLCQAHGLTPDQVVAIASNGGGKQALETVQRLLPVLCQDHGLTPAQVVAIASNNGG  
KQALETVQRLLPVLCQAHGLTPAQVVAIASHDGGKQALETVQRLLPVLCQDHGLTPDQVVAIASNIGGKQ  
ALETVQRLLPVLCQDHGLTPAQVVAIASNGGGKQALETVQRLLPVLCQAHG

**Supplementary Sequence 2. DNA sequences of RPS5A promoter and 35S terminator.**

**RPS5A promoter**

CTCAACTTTTGATTTCGCTATTTGCAGTGCACCTGTGGCGTTCATCACATCTTTTGTGACACTGTTTGCAC  
GGTCATTGCTATTACAAAGGACCTTCCTGATGTTGAAGGAGATCGAAAGTAAGTAACTGCACGCATAAC  
CATTTTCTTTCCGCTCTTTGGCTCAATCCATTTGACAGTCAAAGACAATGTTTAAACCAGCTCCGTTTGATA  
TATTGTCTTTATGTGTTTGTTC AAGCATGTTTAGTTAATCATGCCTTTGATTGATCTTGAATAGGTTCCAAA  
TATCAACCCTGGCAACAAAACCTTGGAGTGAGAAACATTGCATTCCTCGGTCTGGACTTCTGCTAGTAAA  
TTATGTTTCAGCCATATCACTAGCTTTCTACATGCCTCAGGTGAATTCATCTATTTCCGCTTAACTATTTCG  
GTTAATTAAGCACGAACACCATTACTGCATGTAGAAGCTTGATAAACTATCGCCACCAATTTATTTTTGT  
TGCGATATTGTTACTTTCCTCAGTATGCAGCTTTGAAAAGACCAACCCTTTATCCTTTAACAATGAACAG  
GTTTTTAGAGGTAGCTTGATGATTCCTGCACATGTGATCTTGGCTTCAGGCTTAATTTCCAGGTAAAGC  
ATTATGAGATACTTTATATCTTTACATACTTTTGAGATAATGCACAAGAACTTCATACTATATGCTTTA  
GTTTCTGCATTTGACACTGCCAAATTCATTAATCTCTAATATCTTTGTTGTTGATCTTTGGTAGACATGGGT  
ACTAGAAAAAGCAAACCTACACCAAGGTAAAATACTTTTGTACAAACATAAACTCGTTATCACGGAACAT  
CAATGGAGTGTATATCTAACGGAGTGTAGAAACATTTGATTATTGCAGGAAGCTATCTCAGGATATTATC  
GGTTTATATGGAATCTCTTCTACGCAGAGTATCTGTTATTTCCCTTCTCTAGCTTTCAATTCATGGTGAG  
GATATGCAGTTTTCTTTGTATATCATTCTTCTTCTTTGTAGCTTGAGTCAAATCGGTTCCCTTCATGT  
ACATACATCAAGGATATGCCTTCTGAATTTTTATATCTTGCAATAAAAATGCTTGTACCAATTGAAACAC  
CAGCTTTTTGAGTTCTATGATCACTGACTTGGTTCTAACCAAAAAAAAAAAAAATGTTAATTTACATATCT  
AAAAGTAGGTTTAGGGAAACCTAAACAGTAAAATATTTGTATATTATTCGAATTTCACTCATCATAAAAA  
CTTAAATTGCACCATAAAAATTTGTTTTACTATTAATGATGTAATTTGTGTAACCTAAGATAAAAATAATAT  
TCCGTAAGTTAACCGGCTAAAACCACGTATAAACAGGGAACCTGTTAAACCGTTCTTTACTGGATAAAA  
GAAATGAAAGCCCATGTAGACAGCTCCATTAGAGCCCAAACCCTAAATTTCTCATCTATATAAAAGGAGT  
GACATTAGGGTTTTTTGTTTCGTCCTCTTAAAGCTTCTCGTTTTCTCTGCCGTCTCTCTCATTTCGCGGACGCA  
AACGATCTTCAGGTGATCTTCTTCTCCAATCCTCTCTCATAACTCTGATTTTCGTAATTGTGATTTGAGC  
TCACGCTCTGTTTCTCTCACCACAGCC

**35S terminator**

CGGCCATGCTAGAGTCCGCAAAAATCACCAGTCTCTCTCTACAAATCTATCTCTCTATTTTTCTCCAGA  
ATAATGTGTGAGTAGTTCCAGATAAGGGAATTAGGGTTCTTATAGGGTTTCGCTCATGTGTTGAGCATAT  
AAGAAACCCTTAGTATGATTTGTATTTGTAAAATACTTCTATCAATAAAAATTTCTAATTCCTAAAACCAA  
AATCCAGTGACCT
